# Supplementary material
Source: PubMed Central journal article supplement (PMC6350765)
Supplement: MD-010-C8MD00375K-s001.pdf [file MD-010-C8MD00375K-s001.pdf]

## Supplementary material

### **Molecular modelling studies of quinazolinone derivatives as MMP-13 Inhibitors by QSAR, molecular docking and molecular dynamics simulations techniques**

Shanshan Huang, Kairui Feng, and Yujie Ren\*

College of Chemical and Environmental Engineering, Shanghai Institute of Technology, Shanghai, China

Correspondence

Yujie Ren, College of Chemical and Environmental Engineering, Shanghai Institute of Technology, Shanghai, China.

Email: [clab@sit.edu.cn](mailto:clab@sit.edu.cn)

## Outline of the Supplementary material

### 1. Figures

**Fig. S1** Region1 and Region2 used for Topomer CoMFA are shown in blue and red, respectively.

**Fig. S2** Topomer CoMFA contour maps based on compound 26. (A, B) Steric and electrostatic contour maps in Region1. (C, D) Steric and electrostatic contours in Region2.

**Fig. S3** Docking results of all designed compounds D1-8 in the MMP-13 protein.

**Fig. S4** (A) Structural comparison between initial (red) and representative snapshots from MD simulation (blue) of compound 5. (B) The binding mode of 5-MMP-13 after MD simulation.

**Fig. S5** The root-mean-square fluctuation (RMSF) of the compound 26 (black) and 5 (orange) in the MMP-13 complexes obtained from 50 ns MD simulation.

### 2. Tables

**Table S1.** Molecular structures of all compounds with their actual and predicted  $pIC_{50}$  values of CoMFA and CoMSIA

**Table S2** Energy contribution of the key residues of 26-MMP-13 computed by GB method (Kcal Mol<sup>-1</sup>)

**Table S3** Energy contribution of the key residues of D3-MMP-13 computed by GB method (Kcal Mol<sup>-1</sup>)

**Table S4** Energy contribution of the key residues of D8-MMP-13 computed by GB method (Kcal Mol<sup>-1</sup>)

**Table S5** Energy contribution of the key residues of 5-MMP-13 computed by GB method (Kcal Mol<sup>-1</sup>)

**Table S6.** ADMET prediction of designed compounds

## 1. Figure captions

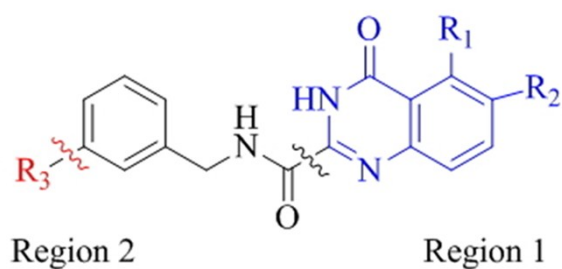

**Fig. S1** Region1 and Region2 used for Topomer CoMFA are shown in blue and red, respectively.

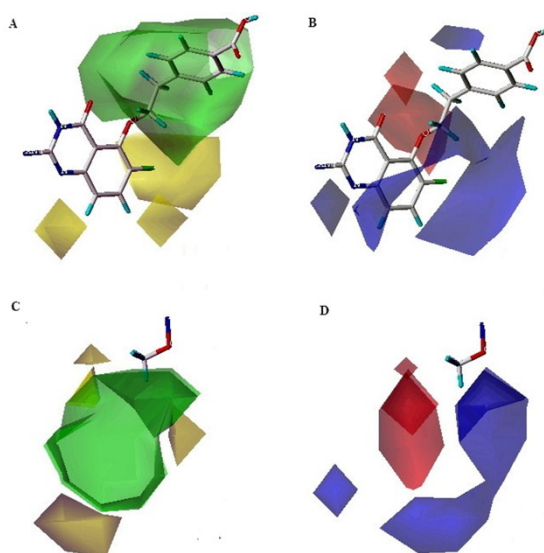

**Fig. S2** Topomer CoMFA contour maps based on compound 26. (A, B) Steric and electrostatic contour maps in Region1. (C, D) Steric and electrostatic contours in Region2.

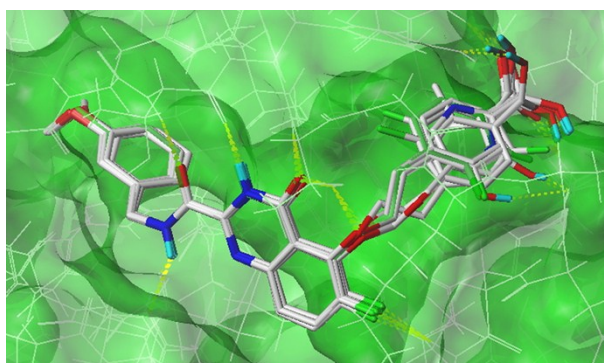

**Fig. S3** Docking results of all designed compounds D1-D8 in the MMP-13 protein

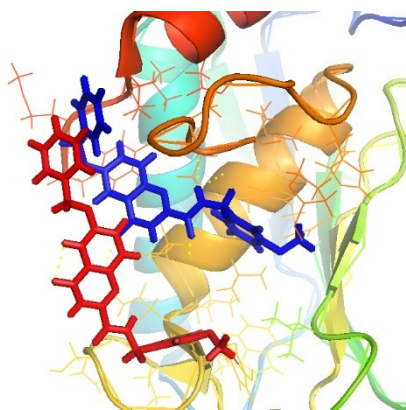

**Fig. S4** Structural comparison between initial (red) and representative snapshots from MD simulation (blue) of compound 5.

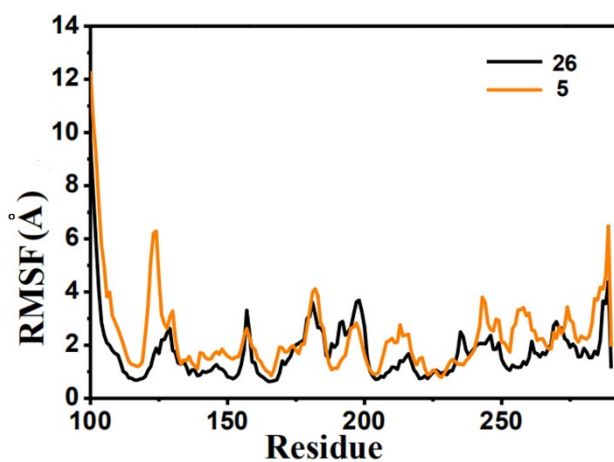

**Fig. S5** The root-mean-square fluctuation (RMSF) of the compound 26 (black) and 5 (orange) in the MMP-13 complexes obtained from 50 ns MD simulation.

## 2. Table captions

**Table S1.** Molecular structures of all compounds with their actual and predicted  $pIC_{50}$  values of CoMFA and CoMSIA

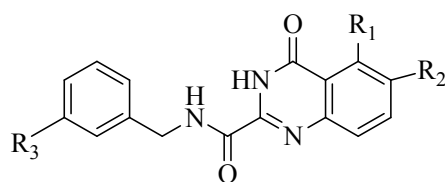

Compound 1-30

| NO. | R <sub>1</sub> | R <sub>2</sub>   | R <sub>3</sub>    | Exp. <sup>a</sup> | CoMFA              |                   | CoMSIA             |                   |
|-----|----------------|------------------|-------------------|-------------------|--------------------|-------------------|--------------------|-------------------|
|     |                |                  |                   |                   | Pred. <sup>b</sup> | Res. <sup>c</sup> | Pred. <sup>d</sup> | Res. <sup>e</sup> |
| 1   | -H             | -H               | -OCH <sub>3</sub> | 7.921             | 7.791              | 0.130             | 7.586              | 0.335             |
| 2   | -H             | -F               | -OCH <sub>3</sub> | 7.959             | 8.070              | -0.111            | 8.123              | -0.164            |
| 3   | -H             | -CH <sub>3</sub> | -OCH <sub>3</sub> | 7.585             | 7.532              | 0.053             | 7.568              | 0.017             |

|     |                                                                                     |                                  |                   |       |       |        |       |        |
|-----|-------------------------------------------------------------------------------------|----------------------------------|-------------------|-------|-------|--------|-------|--------|
| 4*  | -H                                                                                  | -OCF <sub>3</sub>                | -OCH <sub>3</sub> | 7.569 | 7.396 | 0.173  | 7.877 | -0.308 |
| 5   | -H                                                                                  | -OCH <sub>2</sub> Ph             | -OCH <sub>3</sub> | 6.959 | 6.862 | 0.097  | 6.970 | -0.011 |
| 6   | -H                                                                                  | -SO <sub>2</sub> CH <sub>3</sub> | -OCH <sub>3</sub> | 7.638 | 7.642 | -0.004 | 7.667 | -0.029 |
| 7   | -H                                                                                  | -Ph                              | -OCH <sub>3</sub> | 8.009 | 8.004 | 0.005  | 8.081 | -0.072 |
| 8   | -H                                                                                  | -CN                              | -OCH <sub>3</sub> | 8.201 | 8.223 | -0.022 | 8.270 | -0.069 |
| 9   | -F                                                                                  | -H                               | -OCH <sub>3</sub> | 8.301 | 8.111 | 0.190  | 8.086 | 0.215  |
| 10  | -CH <sub>3</sub>                                                                    | -H                               | -OCH <sub>3</sub> | 7.538 | 7.835 | -0.297 | 7.819 | -0.281 |
| 11  | -OCH <sub>3</sub>                                                                   | -H                               | -OCH <sub>3</sub> | 7.602 | 7.734 | -0.132 | 7.640 | -0.038 |
| 12  | -CN                                                                                 | -H                               | -OCH <sub>3</sub> | 8.066 | 8.175 | -0.109 | 8.082 | -0.016 |
| 13  | -Ph                                                                                 | -H                               | -OCH <sub>3</sub> | 8.658 | 8.524 | 0.134  | 8.550 | 0.108  |
| 14  | -OPh                                                                                | -H                               | -OCH <sub>3</sub> | 9.276 | 9.296 | -0.020 | 9.311 | -0.035 |
| 15* | 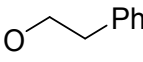   | -H                               | -OCH <sub>3</sub> | 9.161 | 8.692 | 0.469  | 8.905 | 0.256  |
| 16  |   | -H                               | -OCH <sub>3</sub> | 9.284 | 9.251 | 0.033  | 9.276 | 0.008  |
| 17  |  | -H                               | -OCH <sub>3</sub> | 8.796 | 8.786 | 0.010  | 8.741 | 0.055  |
| 18* |  | -H                               | -OCH <sub>3</sub> | 8.367 | 8.284 | 0.083  | 8.134 | 0.233  |
| 19  |  | -H                               | -OCH <sub>3</sub> | 8.013 | 8.155 | -0.142 | 8.061 | -0.048 |
| 20  |  | -H                               | -OCH <sub>3</sub> | 8.538 | 8.555 | -0.017 | 8.502 | 0.036  |
| 21  |  | -H                               | -OCH <sub>3</sub> | 8.770 | 8.690 | 0.080  | 8.705 | 0.065  |
| 22* |  | -H                               | -OCH <sub>3</sub> | 7.796 | 8.656 | -0.860 | 8.051 | -0.255 |
| 23  |  | -H                               | -OCH <sub>3</sub> | 9.004 | 8.955 | 0.049  | 9.010 | -0.006 |
| 24  |  | -H                               | -OCH <sub>3</sub> | 7.469 | 7.502 | -0.033 | 7.470 | -0.001 |
| 25  |  | -F                               | -OCH <sub>3</sub> | 9.824 | 9.757 | 0.067  | 9.872 | -0.048 |

|     |                                                                                   |    |                                                                                   |        |        |        |        |        |
|-----|-----------------------------------------------------------------------------------|----|-----------------------------------------------------------------------------------|--------|--------|--------|--------|--------|
| 26  | 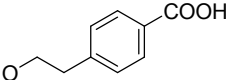 | -F | -OCH <sub>3</sub>                                                                 | 11.409 | 11.377 | 0.032  | 11.408 | 0.001  |
| 27  | -H                                                                                | -H |  | 7.538  | 7.381  | 0.157  | 7.551  | -0.013 |
| 28  | -H                                                                                | -H |  | 8.027  | 8.019  | 0.008  | 8.062  | -0.036 |
| 29  | -H                                                                                | -H |  | 8.796  | 8.872  | -0.076 | 8.799  | -0.003 |
| 30* | -H                                                                                | -H |  | 9.699  | 9.871  | -0.172 | 9.596  | 0.103  |

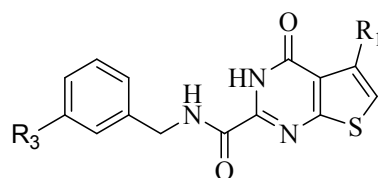

Compound 31-53

| NO. | R <sub>1</sub>   | R <sub>3</sub>                                                                      | Exp. <sup>a</sup> | CoMFA              |                   | CoMSIA             |                   |
|-----|------------------|-------------------------------------------------------------------------------------|-------------------|--------------------|-------------------|--------------------|-------------------|
|     |                  |                                                                                     |                   | Pred. <sup>b</sup> | Res. <sup>c</sup> | Pred. <sup>d</sup> | Res. <sup>c</sup> |
| 31  | -CH <sub>3</sub> | 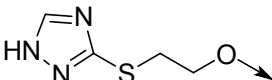 | 10.131            | 10.204             | -0.073            | 10.142             | -0.011            |
| 32  | -CH <sub>3</sub> |  | 8.585             | 8.470              | 0.115             | 8.578              | 0.007             |
| 33  | -CH <sub>3</sub> |  | 10.194            | 10.087             | 0.107             | 10.160             | 0.034             |
| 34* | -CH <sub>3</sub> |  | 8.824             | 8.879              | -0.055            | 8.266              | 0.558             |
| 35  | -CH <sub>3</sub> |  | 8.310             | 8.337              | -0.027            | 8.334              | -0.024            |
| 36  | -CH <sub>3</sub> |  | 9.538             | 9.575              | -0.037            | 9.470              | 0.068             |

|     |                        |                                                                                     |        |        |        |        |        |
|-----|------------------------|-------------------------------------------------------------------------------------|--------|--------|--------|--------|--------|
| 37  | -iPr                   | 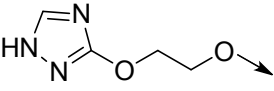   | 10.041 | 10.103 | -0.062 | 10.018 | 0.023  |
| 38  | -Ph                    |    | 10.469 | 10.434 | 0.035  | 10.530 | -0.061 |
| 39  | 2-SH-Ph                |    | 10.569 | 10.569 | 0.000  | 10.591 | -0.022 |
| 40  | 3-SH-Ph                |    | 10.367 | 10.247 | 0.120  | 10.218 | 0.149  |
| 41  | 2-F-Ph                 |    | 10.620 | 10.486 | 0.134  | 10.403 | 0.217  |
| 42  | 3-F-Ph                 |    | 10.444 | 10.450 | -0.006 | 10.459 | -0.015 |
| 43  | 4-F-Ph                 |   | 10.032 | 9.842  | 0.190  | 9.967  | 0.065  |
| 44* | 2-Cl-Ph                |  | 10.268 | 10.691 | -0.423 | 11.008 | -0.740 |
| 45  | 3-Cl-Ph                |  | 10.244 | 10.240 | 0.004  | 10.374 | -0.130 |
| 46  | 4-Cl-Ph                |  | 9.357  | 9.580  | -0.223 | 9.425  | -0.068 |
| 47  | 2-OCH <sub>3</sub> -Ph |  | 9.538  | 9.644  | -0.106 | 9.648  | -0.110 |
| 48  | 3-OCH <sub>3</sub> -Ph |  | 10.585 | 10.687 | -0.102 | 10.698 | -0.113 |
| 49* | 4-OCH <sub>3</sub> -Ph |  | 10.000 | 9.887  | 0.113  | 9.957  | 0.043  |
| 50  | 2-F-Ph                 |  | 10.208 | 10.255 | -0.047 | 10.087 | 0.121  |

|    |         |                                                                                   |        |        |        |        |        |
|----|---------|-----------------------------------------------------------------------------------|--------|--------|--------|--------|--------|
| 51 | 3-F-Ph  | 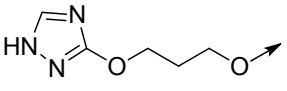 | 9.854  | 9.961  | -0.107 | 9.895  | -0.041 |
| 52 | 2-Cl-Ph |  | 10.229 | 10.214 | 0.015  | 10.333 | -0.104 |
| 53 | 3-Cl-Ph |  | 10.108 | 10.119 | -0.011 | 10.065 | 0.043  |

<sup>a</sup> Experimental pIC<sub>50</sub>.

<sup>b</sup> Predicted pIC<sub>50</sub> by CoMFA model.

<sup>c</sup> Relative error of (Predicted pIC<sub>50</sub> - Experimental pIC<sub>50</sub>).

<sup>d</sup> Predicted pIC<sub>50</sub> by CoMSIA model.

\* The samples of the test set

**Table S2** Energy contribution of the key residues of 26-MMP-13 computed by GB method (Kcal Mol<sup>-1</sup>)

| No.    | S <sub>VDW</sub> | B <sub>VDW</sub> | S <sub>ELE</sub> | B <sub>ELE</sub> | S <sub>GB</sub> | B <sub>GB</sub> | T <sub>GBSUR</sub> | T <sub>GBTOT</sub> |
|--------|------------------|------------------|------------------|------------------|-----------------|-----------------|--------------------|--------------------|
| Lys140 | -0.0427          | -0.0044          | -0.0432          | -0.0015          | -0.0061         | -0.0002         | -1.0029            | -0.0801            |
| Asn215 | -0.3137          | -0.1222          | -0.6304          | -0.028           | -0.0892         | -0.004          | -1.3567            | -0.0915            |
| Ala238 | -0.2542          | -0.6753          | -0.0621          | -0.3314          | -0.0088         | -0.0469         | -0.011             | -0.6413            |
| Phe241 | -0.6656          | -0.5842          | -0.1227          | -0.3151          | -0.0174         | -0.0446         | -0.0598            | -0.2913            |
| Tyr244 | -3.1259          | -0.6191          | -0.3808          | -0.1511          | -0.0539         | -0.0214         | -0.3397            | -0.2298            |
| Thr245 | -0.4257          | 0.1220           | -0.107           | -0.759           | -0.0151         | -0.1065         | -0.0795            | -0.9358            |
| Tyr246 | -1.6733          | -0.5072          | -0.2648          | -0.0722          | -0.0375         | -0.0102         | -0.1676            | -0.2116            |
| Thr247 | -1.5744          | -0.2513          | -0.216           | -0.3584          | -0.0305         | -0.0507         | -0.7179            | -0.574             |
| Met253 | -0.0758          | -0.0143          | -0.018           | -0.0027          | -0.0025         | -0.0004         | -0.0697            | -0.0228            |

**Table S3** Energy contribution of the key residues of D3-MMP-13 computed by GB method (Kcal Mol<sup>-1</sup>)

| No.    | S <sub>VDW</sub> | B <sub>VDW</sub> | S <sub>ELE</sub> | B <sub>ELE</sub> | S <sub>GB</sub> | B <sub>GB</sub> | T <sub>GBSUR</sub> | T <sub>GBTOT</sub> |
|--------|------------------|------------------|------------------|------------------|-----------------|-----------------|--------------------|--------------------|
| Lys140 | -0.0077          | -0.0013          | -0.003           | -0.0005          | -0.0004         | -0.0001         | -0.2331            | -0.0376            |
| Asn215 | -0.4545          | -0.2159          | -0.284           | -0.1031          | -0.0402         | -0.0146         | -0.6535            | -0.3231            |
| Ala238 | -0.1491          | -0.5193          | -0.0623          | -0.1961          | -0.0088         | -0.0277         | -0.01              | -0.3838            |
| Phe241 | -0.6999          | -0.5899          | -0.1617          | -0.1823          | -0.0229         | -0.0258         | -0.0485            | -0.3372            |
| Tyr244 | -2.5098          | -0.7016          | -0.5434          | -0.1929          | -0.0769         | -0.0273         | -0.859             | -0.4211            |
| Thr245 | -0.6513          | -0.2601          | -0.2447          | -0.5939          | -0.0346         | -0.084          | -0.1497            | -1.1897            |
| Tyr246 | -1.6547          | -0.5387          | -0.3214          | -0.0876          | -0.0455         | -0.0124         | -0.2558            | -0.3034            |
| Thr247 | -1.5921          | -0.3081          | -0.3037          | -0.3602          | -0.0429         | -0.0509         | -0.7909            | -0.5645            |
| Met253 | -0.0093          | -0.0172          | -0.0019          | -0.0041          | -0.0003         | -0.0006         | -0.0076            | -0.0335            |



**Table S4** Energy contribution of the key residues of D8-MMP-13 computed by GB method (Kcal Mol<sup>-1</sup>)

| No.    | S <sub>VDW</sub> | B <sub>VDW</sub> | S <sub>ELE</sub> | B <sub>ELE</sub> | S <sub>GB</sub> | B <sub>GB</sub> | T <sub>GBSUR</sub> | T <sub>GBTOT</sub> |
|--------|------------------|------------------|------------------|------------------|-----------------|-----------------|--------------------|--------------------|
| Lys140 | -0.0527          | -0.0039          | -0.0288          | -0.0011          | -0.0041         | -0.0002         | -0.5245            | -0.1031            |
| Asn215 | -0.7365          | -0.2011          | 0.3604           | 0.0676           | -0.051          | -0.0096         | -0.782             | -0.1782            |
| Ala238 | -0.2250          | -0.5940          | -0.0574          | -0.3673          | -0.0081         | -0.0519         | -0.0157            | -0.675             |
| Phe241 | -0.6365          | -0.7080          | -0.0927          | -0.1632          | -0.0131         | -0.0231         | -0.0391            | -0.3509            |
| Tyr244 | -3.0677          | -0.6441          | -0.676           | -0.1802          | -0.0956         | -0.0255         | -0.8052            | -0.2374            |
| Thr245 | -0.5217          | 0.1805           | -0.1042          | -0.6227          | -0.0147         | -0.0881         | -0.0966            | -0.6479            |
| Tyr246 | -1.8250          | -0.4339          | -0.465           | -0.1176          | -0.0658         | -0.0166         | -0.3026            | -0.2354            |
| Thr247 | -1.3174          | -0.3354          | -0.5978          | -0.3488          | -0.0845         | -0.0493         | -1.5355            | -0.595             |
| Met253 | -0.0177          | -0.0094          | -0.0066          | -0.0039          | -0.0009         | -0.0006         | -0.0355            | -0.019             |

**Table S5** Energy contribution of the key residues of 5-MMP-13 computed by GB method (Kcal Mol<sup>-1</sup>)

| No.    | S <sub>VDW</sub> | B <sub>VDW</sub> | S <sub>ELE</sub> | B <sub>ELE</sub> | S <sub>GB</sub> | B <sub>GB</sub> | T <sub>GBSUR</sub> | T <sub>GBTOT</sub> |
|--------|------------------|------------------|------------------|------------------|-----------------|-----------------|--------------------|--------------------|
| Lys140 | -0.0017          | -0.0009          | -0.0007          | -0.0003          | -0.0001         | -0.0001         | -0.1123            | -0.0368            |
| Asn215 | -0.1639          | -0.0954          | -0.0631          | -0.0631          | -0.0089         | -0.0089         | -0.0877            | -0.1778            |
| Ala238 | -0.0117          | -0.0351          | -0.0026          | -0.0098          | -0.0004         | -0.0014         | -0.0073            | -0.0587            |
| Phe241 | -0.1327          | -0.4949          | -0.0255          | -0.1107          | -0.0036         | -0.0157         | -0.0149            | -0.2788            |
| Tyr244 | -0.7895          | -0.4072          | -0.3623          | -0.148           | -0.0512         | -0.0209         | -0.2851            | -0.1917            |
| Thr245 | -0.2506          | -0.6661          | -0.1071          | -0.3508          | -0.0151         | -0.0496         | -0.1006            | -1.3028            |
| Tyr246 | -0.4204          | -0.3712          | -0.2027          | -0.1697          | -0.0287         | -0.024          | -0.0709            | -0.2864            |
| Thr247 | -0.2425          | -0.2108          | -0.4007          | -0.1049          | -0.0567         | -0.0148         | -1.3574            | -0.4271            |
| Met253 | -0.2636          | -0.3046          | -0.2218          | -0.1287          | -0.0314         | -0.0182         | -0.1039            | -0.2953            |

S represents the contribution of the side chain;

B represents the contribution of the main chain;

T represents the total contribution;

ELE is the vacuum electrostatic interaction;

VDW is the vacuum van der Waals interaction;

GB is the polar solvation energy calculated by GB method;

GBSUR is a non polar solvation energy;

S<sub>VDW</sub> is a residue side chain vacuum van der Waals interaction

**Table S6** ADMET prediction of designed compounds

| No.    | ADMET Solubility | ADMET Solubility Level | ADMET BBB Level | ADMET CYP2D6 | ADMET CYP2D6 Probability | ADMET Hepatotoxicity | ADMET Hepatotoxicity Probability | ADMET Absorption Level | ADMET PPB Level | ADMET AlogP98 | ADMET PSA-2D |
|--------|------------------|------------------------|-----------------|--------------|--------------------------|----------------------|----------------------------------|------------------------|-----------------|---------------|--------------|
| 21k-Na | -4.44            | 2                      | 4               | 0            | 0.346                    | 1                    | 0.92                             | 1                      | 0               | 3.41          | 115.636      |
| D1-Na  | -4.755           | 2                      | 4               | 0            | 0.306                    | 1                    | 0.913                            | 1                      | 0               | 3.616         | 115.636      |
| D2-Na  | -4.347           | 2                      | 4               | 0            | 0.306                    | 1                    | 0.913                            | 2                      | 0               | 3.168         | 136.451      |
| D3-Na  | -5.079           | 2                      | 4               | 0            | 0.297                    | 1                    | 0.913                            | 1                      | 0               | 3.821         | 115.636      |
| D4-Na  | -5.089           | 2                      | 4               | 0            | 0.306                    | 1                    | 0.966                            | 1                      | 0               | 3.821         | 115.636      |
| D5-Na  | -3.979           | 3                      | 4               | 0            | 0.326                    | 1                    | 0.907                            | 1                      | 0               | 2.688         | 126.897      |
| D6-Na  | -4.451           | 2                      | 4               | 0            | 0.306                    | 1                    | 0.913                            | 2                      | 0               | 2.985         | 147.712      |
| D7-Na  | -4.637           | 2                      | 4               | 0            | 0.306                    | 1                    | 0.913                            | 1                      | 0               | 3.275         | 126.897      |
| D8-Na  | -5.471           | 2                      | 4               | 0            | 0.386                    | 1                    | 0.887                            | 2                      | 1               | 4.271         | 124.566      |
